# Supplementary material for: A new family of {Co4Ln8} metallacrowns with a butterfly-shaped structure
Source: Royal Society of Chemistry journal article supplement (doi:10.1039/c9qi00661c), 2019-01-01
Supplement: c9qi00661c1.pdf [file c9qi00661c1.pdf]

## Supporting Information

# A New Family of $\{Co_4Ln_8\}$ Metallocrowns with a Butterfly-Shaped Structure

Hong-Gang Zhang,\* Yu-Chang Du, Hua Yang, Man-Yun Zhuang, Da-Cheng Li and Jian-Min Dou\*

Shandong Provincial Key Laboratory of Chemical Energy Storage and Novel Cell Technology, School of Chemical and Chemical Engineering, Liaocheng University, 252059 Liaocheng, P. R. China

### Table of contents

|                                    |    |
|------------------------------------|----|
| 1: Syntheses.....                  | S2 |
| 2: Crystal Data and Structure..... | S2 |
| 3: Magnetic Measurements.....      | S5 |
| 4: References.....                 | S8 |

## 1: Syntheses.

Compound H<sub>2</sub>pyzha<sup>[1]</sup> was prepared according to the literature procedures. All reagents were purchased from commercial sources and used without further purification.

[Dy(pyxic){Dy<sub>3</sub>Co<sub>2</sub>(pyzha)<sub>6</sub>(\*pyzha)(NO<sub>3</sub>)<sub>2</sub>(H<sub>2</sub>O)(MeOH)<sub>2</sub>}]<sub>2</sub>·(NO<sub>3</sub>)<sub>2</sub>·10H<sub>2</sub>O·8MeOH (**1**). H<sub>2</sub>pyzha (60.8 mg, 0.4375 mmol), 2-Pyrazinecarboxylic acid (7.75 mg, 0.0625 mmol), Co(NO<sub>3</sub>)<sub>2</sub>·6H<sub>2</sub>O (145.5 mg, 0.5 mmol), and Dy(NO<sub>3</sub>)<sub>3</sub>·6H<sub>2</sub>O (45.6 mg, 0.1 mmol) were dissolved in MeOH (20 ml) together. The solution was stirred for 5 h and turned into brown. The dark brown crystals were crystallized upon slow evaporation of the solvent at room temperature for two months. Yield: 15%. Calcd for C<sub>92</sub>H<sub>122</sub>Dy<sub>8</sub>Co<sub>4</sub>N<sub>52</sub>O<sub>74</sub>: C, 23.63; H, 2.52; N, 15.58%. Found: C, 23.31; H, 2.53; N, 15.45%. FT-IR (KBr pellet, cm<sup>-1</sup>): 3419 (br), 1583 (s), 1522 (w), 1470 (m), 1429 (m), 1384 (s), 1209 (w), 1165 (m), 1100 (s), 1050 (m), 949 (m), 839 (w), 767 (w), 751 (m), 553 (w), 506 (m), 450 (m).

[Ho(pyxic){Ho<sub>3</sub>Co<sub>2</sub>(pyzha)<sub>6</sub>(\*pyzha)(NO<sub>3</sub>)<sub>2</sub>(H<sub>2</sub>O)(MeOH)<sub>2</sub>}]<sub>2</sub>·(NO<sub>3</sub>)<sub>2</sub>·10H<sub>2</sub>O·8MeOH (**2**). Complex **2** were generated by adopting the procedures similar to those used for **1** except that Dy(NO<sub>3</sub>)<sub>3</sub>·6H<sub>2</sub>O was replaced by Ho(NO<sub>3</sub>)<sub>3</sub>·6H<sub>2</sub>O (45.8 mg, 0.1 mmol). Yield: 18%. Calcd for C<sub>94</sub>H<sub>126</sub>Ho<sub>8</sub>Co<sub>4</sub>N<sub>52</sub>O<sub>74</sub>: C, 23.88; H, 2.67; N, 15.41%. Found: C, 23.27; H, 2.57; N, 15.52%. FT-IR (KBr pellet, cm<sup>-1</sup>): 3415 (br), 1630 (m), 1583 (s), 1522 (w), 1471 (m), 1429 (m), 1384 (s), 1210 (w), 1166 (m), 1101 (s), 1050 (m), 950 (m), 839 (w), 767 (w), 752 (m), 733 (w), 676 (w), 554 (w), 506 (m), 451 (m).

[Tm(pyxic){Tm<sub>3</sub>Co<sub>2</sub>(pyzha)<sub>6</sub>(\*pyzha)(NO<sub>3</sub>)<sub>2</sub>(H<sub>2</sub>O)<sub>2</sub>(MeOH)<sub>2</sub>}]<sub>2</sub>·(NO<sub>3</sub>)<sub>2</sub>·14H<sub>2</sub>O·8MeOH (**3**). Complex **3** were generated by adopting the procedures similar to those used for **1** except that Dy(NO<sub>3</sub>)<sub>3</sub>·6H<sub>2</sub>O was replaced by Tm(NO<sub>3</sub>)<sub>3</sub>·6H<sub>2</sub>O (44.5 mg, 0.1 mmol). Yield: 61%. Calcd for C<sub>90</sub>H<sub>128</sub>Tm<sub>8</sub>Co<sub>4</sub>N<sub>52</sub>O<sub>78</sub>: C, 22.61; H, 2.68; N, 15.24%. Found: C, 22.11; H, 2.55; N, 15.41%. FT-IR (KBr pellet, cm<sup>-1</sup>): 3419 (br), 1633 (m), 1584 (s), 1522 (w), 1471 (m), 1429 (m), 1384 (s), 1210 (w), 1166 (w), 1103 (s), 1049 (w), 951 (m), 834 (w), 767 (w), 752 (m), 734 (w), 556 (w), 506 (m), 455 (m).

## 2: Crystal Data and Structure.

X-ray Crystallography. Single-crystal X-ray diffraction data for compounds **1-3** were collected on a Bruker Smart CCD area-detector diffractometer with Cu K $\alpha$  radiation ( $\lambda = 1.54184 \text{ \AA}$ ) by  $\omega$ -scan mode operating at 128(3) K. The program SAINT was used for integration of the diffraction profiles, and semiempirical absorption corrections were applied using SADABS.<sup>2,3</sup> All of the structures were solved by direct methods using the SHELXS program of the SHELXTL package and refined by full-matrix least-squares methods with SHELXL.<sup>4</sup>

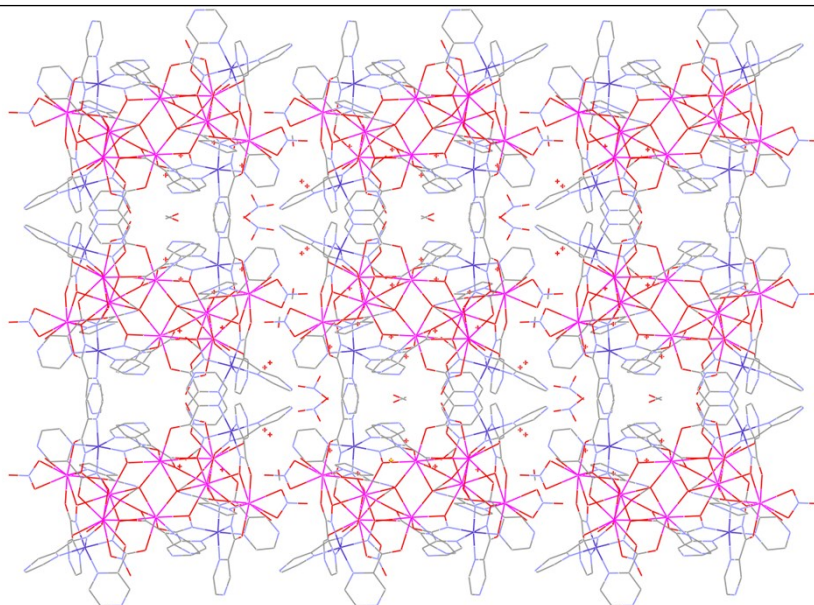

Figure S1. Packing arrangement of complexes along the b-axis. (H atoms are omitted for clarity)

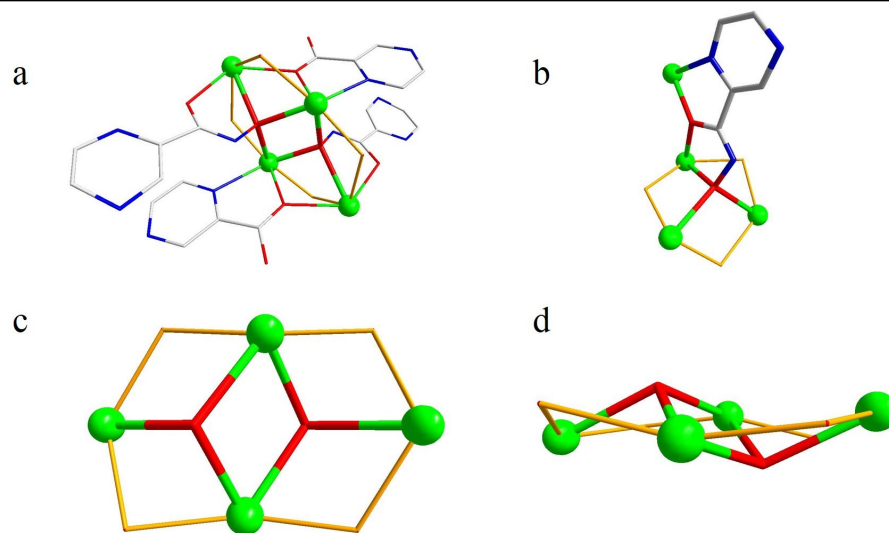

Figure S2. The central frame is constructed by the coordination of *\*pyzha*<sup>2-</sup> and *pyzic*<sup>-</sup> (a), The four-coordinate oxygen ion (oxime) from the *\*pyzha*<sup>2-</sup> form a triangular structure (b), The triangular structure top view (c), side view (d).

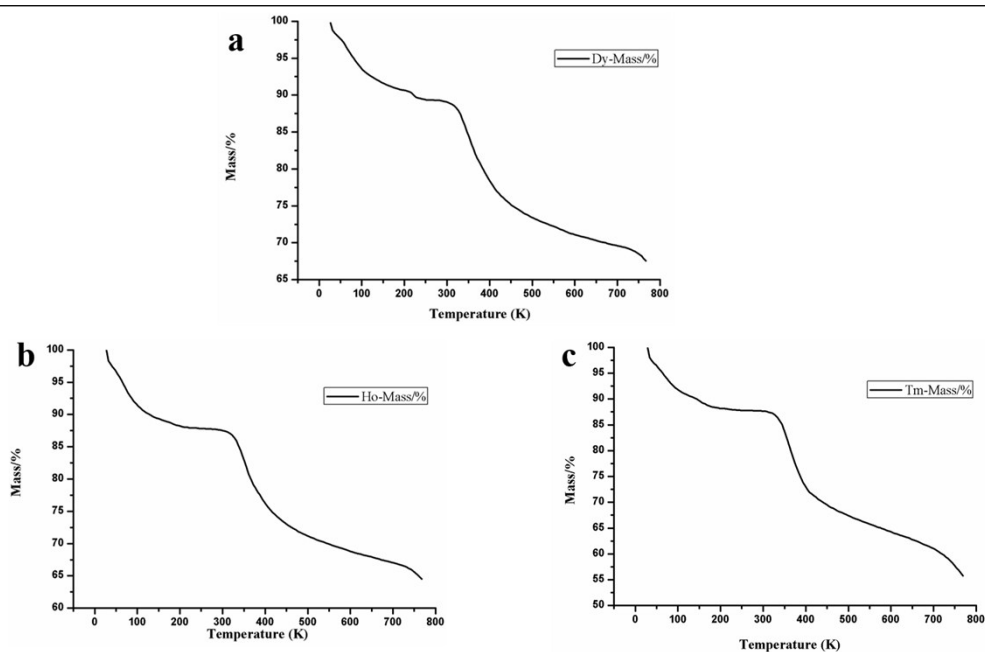

Figure S3. Thermogravimetric analysis of complexes:  $\{\text{Co}^{\text{III}}_4\text{Dy}_8\}$ -**1** (a),  $\{\text{Co}^{\text{III}}_4\text{Ho}_8\}$ -**2** (b),  $\{\text{Co}^{\text{III}}_4\text{Tm}_8\}$ -**3** (c).

Table S1. Crystal data and structure refinement for **1-3**.

| complex                | <b>1</b>                 | <b>2</b>                 | <b>3</b>                 |
|------------------------|--------------------------|--------------------------|--------------------------|
| Chemical formula       | C92 H122 Co4 Dy8 N52 O74 | C94 H126 Co4 Ho8 N52 O74 | C90 H128 Co4 Tm8 N52 O78 |
| CCDC number            | 1843821                  | 1904669                  | 1900536                  |
| M, g mol <sup>-1</sup> | 4672.1                   | 4723.63                  | 4773.61                  |
| Crystal system         | Orthorhombic             | Orthorhombic             | Orthorhombic             |
| a /Å                   | 23.688(3)                | 24.0051(9)               | 24.1637(9)               |

|                                                 |                 |                  |                  |
|-------------------------------------------------|-----------------|------------------|------------------|
| b/Å                                             | 17.7123(17)     | 17.2920(6)       | 17.1973(9)       |
| c/Å                                             | 33.552(3)       | 33.5961(8)       | 33.5830(12)      |
| Unit cell volume/Å <sup>3</sup>                 | 14077(3)        | 13945.6(8)       | 13955.4(10)      |
| Temperature/K                                   | 128(3)          | 128(3)           | 128(3)           |
| Space group                                     | Pbca            | Pbca             | Pbca             |
| Z                                               | 4               | 4                | 4                |
| Absorption coefficient, μ/mm <sup>-1</sup>      | 26.733          | 12.529           | 13.570           |
| R <sub>int</sub>                                | 0.1390          | 0.0661           | 0.0574           |
| R1 a (I > 2σ(I))                                | 0.0979          | 0.0787           | 0.0850           |
| wR2 b (all data)                                | 0.2322          | 0.2185           | 0.2230           |
| Goodness of fit on F <sup>2</sup>               | 1.086           | 1.084            | 1.027            |
| Largest diff. peak and hole / e.Å <sup>-3</sup> | 1.450 and -1875 | 1.303 and -1.563 | 3.061 and -3.343 |

$${}^aR_1 = \frac{\sum |F_o| - |F_c|}{\sum |F_o|}, {}^b wR_2 = \frac{[\sum w(F_o^2 - F_c^2)^2]}{[\sum w(F_o^2)^2]}^{1/2}$$

Table S2. Selected bond distances (Å) and angles (deg) for **1**.

|                               |                              |                              |                               |                              |
|-------------------------------|------------------------------|------------------------------|-------------------------------|------------------------------|
| Dy(1)-O(15) 2.330(16)         | Dy(2)-O(12) 2.398(15)        | Dy(4)-O(3) 2.407(15)         | Dy(2)-O(4) 2.335(17)          | Dy(3)-O(17) 2.401(18)        |
| Dy(1)-O(10) 2.345(17)         | Dy(2)-O(1) 2.450(11)         | Dy(4)-O(27) 2.478(18)        | Dy(2)-O(2) 2.342(18)          | Dy(3)-O(19) 2.429(18)        |
| Dy(1)-O(3) 2.380(16)          | Dy(2)-O(16) 2.498(17)        | Dy(4)-O(28) 2.498(17)        | Dy(2)-O(5) 2.357(13)          | Dy(3)-O(22) 2.51(2)          |
| Dy(1)-O(7) 2.398(16)          | Dy(2)-N(21) 2.52(2)          | Dy(4)-N(18) 2.76(2)          | Dy(3)-O(20) 2.616(19)         | Dy(4)-O(6) 2.33(2)           |
| Dy(1)-O(13) 2.441(14)         | Dy(2)-N(20) 2.92(2)          | Co(1)-N(17) 1.840(2)         | Dy(4)-O(15) 2.303(13)         | Dy(4)-O(18) 2.346(17)        |
| Dy(1)-O(1) 2.453(16)          | Dy(3)-O(8) 2.303(18)         | Co(1)-N(14) 1.864(2)         | Dy(4)-O(13) 2.32(2)           | Dy(4)-O(14) 2.38(2)          |
| Dy(1)-O(5) 2.456(17)          | Dy(3)-O(10) 2.320(16)        | Co(1)-N(3) 1.898(16)         | Dy(2)-O(4) 2.335(17)          | Dy(3)-O(17) 2.401(18)        |
| Dy(1)-O(12) 2.486(15)         | Dy(3)-O(7) 2.349(18)         | Co(1)-N(15) 1.913(2)         | Dy(2)-O(2) 2.342(18)          | Dy(3)-O(19) 2.429(18)        |
| Dy(1)-O(16) 2.521(13)         | Dy(3)-O(11) 2.373(14)        | Co(1)-N(1) 1.934(2)          | Dy(2)-O(5) 2.357(13)          | Dy(3)-O(22) 2.51(2)          |
| Dy(2)-O(16) 2.245(18)         | Dy(3)-O(9) 2.383(15)         | Co(1)-N(13) 1.953(18)        | Dy(3)-O(20) 2.616(19)         | Dy(4)-O(6) 2.33(2)           |
| O(15)-Dy(1)-O(10)<br>141.8(5) | O(15)-Dy(1)-O(3)<br>68.6(5)  | O(10)-Dy(1)-O(3)<br>106.2(5) | O(3)-Dy(1)-O(1)<br>134.1(5)   | O(7)-Dy(1)-O(1)<br>137.8(6)  |
| O(15)-Dy(1)-O(7)<br>142.8(6)  | O(10)-Dy(1)-O(7)<br>64.4(6)  | O(3)-Dy(1)-O(7)<br>79.2(5)   | O(15)-Dy(1)-O(5)<br>79.1(6)   | O(10)-Dy(1)-O(5)<br>138.6(5) |
| O(15)-Dy(1)-O(13)<br>68.1(6)  | O(10)-Dy(1)-O(13)<br>76.8(6) | O(3)-Dy(1)-O(13)<br>59.6(6)  | O(7)-Dy(1)-O(5)<br>77.1(5)    | O(13)-Dy(1)-O(5)<br>134.2(6) |
| O(7)-Dy(1)-O(13)<br>111.1(5)  | O(15)-Dy(1)-O(1)<br>79.3(6)  | O(10)-Dy(1)-O(1)<br>79.4(6)  | O(15)-Dy(1)-O(12)<br>128.1(5) | O(10)-Dy(1)-O(12)<br>70.8(5) |
| O(7)-Dy(1)-O(5)<br>77.1(5)    | O(13)-Dy(1)-O(5)<br>134.2(6) | O(7)-Dy(1)-O(5)<br>77.1(5)   | O(3)-Dy(1)-O(1)<br>134.1(5)   | O(7)-Dy(1)-O(1)<br>137.8(6)  |
| N(3)-Co(1)-N(15)<br>94.5(8)   | N(17)-Co(1)-N(1)<br>172.5(8) | N(14)-Co(1)-N(1)<br>89.8(10) | O(15)-Dy(1)-O(5)<br>79.1(6)   | O(10)-Dy(1)-O(5)<br>138.6(5) |

Table S3. Selected bond distances (Å) and angles (deg) for **2**.

|                       |                       |                      |                      |                      |
|-----------------------|-----------------------|----------------------|----------------------|----------------------|
| Ho(1)-O(11) 2.299(9)  | Ho(1)-O(1) 2.307(10)  | Ho(2)-O(2) 2.382(9)  | Ho(2)-O(10) 2.427(9) | Ho(3)-O(12) 2.442(9) |
| Ho(1)-O(9) 2.339(11)  | Ho(1)-O(21) 2.344(12) | Ho(2)-O(3) 2.393(9)  | Ho(2)-O(13) 2.429(9) | Ho(4)-O(4) 2.330(10) |
| Ho(1)-O(10) 2.377(10) | Ho(1)-O(2) 2.378(9)   | Ho(2)-O(38) 2.407(9) | Ho(2)-O(12) 2.518(8) | Ho(4)-O(38) 2.343(9) |

|                               |                               |                               |                               |                               |
|-------------------------------|-------------------------------|-------------------------------|-------------------------------|-------------------------------|
| Ho(1)-O(40) 2.389(14)         | Ho(1)-O(39) 2.639(15)         | Ho(2)-O(7) 2.416(9)           | Ho(3)-O(5) 2.326(9)           | Ho(4)-O(14) 2.354(9)          |
| Ho(1)-N(20) 2.752(15)         | Ho(2)-O(11) 2.357(10)         | Ho(2)-O(37) 2.422(9)          | Ho(3)-O(37) 2.335(8)          | Ho(4)-O(15) 2.364(10)         |
| Ho(4)-O(22) 2.372(12)         | Ho(4)-O(3) 2.392(9)           | Ho(4)-O(23) 2.424(11)         | Ho(4)-O(18) 2.487(13)         | Ho(4)-O(19) 2.628(13)         |
| Co(2)-N(17) 1.963(13)         | Co(2)-N(14) 1.960(13)         | Co(2)-N(11) 1.941(11)         | Co(1)-N(8) 1.958(11)          | Co(1)-N(3) 1.968(12)          |
| Co(2)-N(16) 1.880(12)         | Co(2)-N(10) 1.891(12)         | Co(2)-N(16) 1.880(12)         | Co(1)-N(4) 1.882(13)          | Co(1)-N(1) 1.900(12)          |
| O(11)-Ho(1)-O(1)<br>84.0(3)   | O(11)-Ho(1)-O(9)<br>87.5(4)   | O(1)-Ho(1)-O(9)<br>155.4(4)   | O(11)-Ho(1)-O(21)<br>130.4(4) | O(1)-Ho(1)-O(21)<br>78.4(4)   |
| O(9)-Ho(1)-O(21)<br>89.9(4)   | O(11)-Ho(1)-O(10)<br>70.9(3)  | O(1)-Ho(1)-O(10)<br>129.7(3)  | O(9)-Ho(1)-O(10)<br>67.8(4)   | O(21)-Ho(1)-O(10)<br>149.9(4) |
| O(11)-Ho(1)-O(2)<br>69.3(3)   | O(1)-Ho(1)-O(2)<br>69.5(3)    | O(9)-Ho(1)-O(2)<br>128.3(4)   | O(21)-Ho(1)-O(2)<br>140.4(4)  | O(10)-Ho(1)-O(2)<br>61.2(3)   |
| O(11)-Ho(1)-O(40)<br>149.2(4) | O(1)-Ho(1)-O(40)<br>119.5(4)  | O(9)-Ho(1)-O(40)<br>77.8(4)   | O(21)-Ho(1)-O(40)<br>77.1(5)  | O(10)-Ho(1)-O(40)<br>78.5(4)  |
| O(2)-Ho(1)-O(40)<br>98.9(4)   | O(11)-Ho(1)-O(39)<br>138.6(4) | O(1)-Ho(1)-O(39)<br>69.9(4)   | O(9)-Ho(1)-O(39)<br>128.5(4)  | O(21)-Ho(1)-O(39)<br>76.1(5)  |
| O(10)-Ho(1)-O(39)<br>101.5(4) | O(2)-Ho(1)-O(39)<br>71.6(4)   | O(40)-Ho(1)-O(39)<br>50.8(4)  | O(11)-Ho(1)-N(20)<br>60.3(4)  | O(1)-Ho(1)-N(20)<br>87.2(4)   |
| O(9)-Ho(1)-N(20)<br>68.6(4)   | O(21)-Ho(1)-N(20)<br>72.8(5)  | O(10)-Ho(1)-N(20)<br>114.1(4) | O(2)-Ho(1)-N(20)<br>126.2(3)  | O(40)-Ho(1)-N(20)<br>134.2(5) |
| O(39)-Ho(1)-N(20)<br>144.4(5) | N(7)-Co(1)-N(4)<br>90.5(5)    | N(7)-Co(1)-N(1)<br>91.6(5)    | N(7)-Co(1)-N(5)<br>171.8(5)   | N(1)-Co(1)-N(8)<br>170.6(5)   |

Table S4. Selected bond distances (Å) and angles (deg) for **3**.

|                              |                              |                              |                              |                              |
|------------------------------|------------------------------|------------------------------|------------------------------|------------------------------|
| Tm(1)-O(3) 2.264(11)         | Tm(1)-O(18) 2.273(15)        | Tm(1)-O(17) 2.283(14)        | Tm(1)-O(6) 2.288(13)         | Tm(1)-O(2) 2.297(13)         |
| Tm(1)-O(5) 2.340(13)         | Tm(1)-O(1) 2.359(12)         | Tm(1)-N(4) 2.699(17)         | Tm(1)-O(19) 2.718(15)        | Tm(4)-O(22) 2.712(16)        |
| Tm(2)-O(4) 2.232(11)         | Tm(2)-O(8) 2.294(11)         | Tm(2)-O(7) 2.299(10)         | Tm(2)-O(16)#1 2.30(11)       | Tm(2)-O(12)#1 2.370(12)      |
| Tm(2)-O(4)#1 2.419(11)       | Tm(2)-O(15)#1 2.43(10)       | Tm(2)-N(10)#1 2.467(14)      | Tm(4)-O(10) 2.326(12)        | Tm(4)-O(24) 2.436(15)        |
| Tm(3)-O(3)#1 2.313(12)       | Tm(3)-O(1)#1 2.372(11)       | Tm(3)-O(9) 2.380(12)         | Tm(3)-O(14) 2.385(12)        | Tm(3)-O(15) 2.401(11)        |
| Tm(3)-O(5)#1 2.405(12)       | Tm(3)-O(12) 2.419(11)        | Tm(3)-O(7) 2.428(11)         | Tm(3)-O(4)#1 2.518(11)       | Tm(4)-O(21) 2.343(14)        |
| Co(2)-N(23) 1.904(12)        | Tm(4)-O(11) 2.315(11)        | Tm(4)-O(14) 2.318(13)        | Co(1)-N(15) 1.956(13)        | Tm(4)-O(13) 2.339(13)        |
| Co(2)-N(20) 1.878(14)        | Tm(4)-O(25) 2.361(14)        | Tm(4)-O(9) 2.377(12)         | Co(2)-N(7)#1 1.967(16)       | Co(2)-N(18) 1.959(14)        |
| Co(1)-N(17) 1.893(14)        | Co(1)-N(3)#1 1.893(13)       | Co(1)-N(14) 1.897(12)        | Co(1)-N(12) 1.943(13)        | Co(1)-N(1)#1 1.951(14)       |
| O(3)-Tm(1)-O(18)<br>149.0(5) | O(3)-Tm(1)-O(17)<br>133.7(5) | O(18)-Tm(1)-O(17)<br>76.0(6) | O(3)-Tm(1)-O(6)<br>89.9(4)   | O(18)-Tm(1)-O(6)<br>80.3(5)  |
| O(17)-Tm(1)-O(6)<br>89.3(5)  | O(3)-Tm(1)-O(2)<br>85.6(4)   | O(18)-Tm(1)-O(2)<br>114.6(4) | O(17)-Tm(1)-O(2)<br>77.0(5)  | O(6)-Tm(1)-O(2)<br>155.9(5)  |
| O(3)-Tm(1)-O(5)<br>70.7(4)   | O(18)-Tm(1)-O(5)<br>78.3(5)  | O(17)-Tm(1)-O(5)<br>149.1(5) | O(6)-Tm(1)-O(5)<br>69.6(5)   | O(2)-Tm(1)-O(5)<br>130.1(4)  |
| O(3)-Tm(1)-O(1)<br>69.0(4)   | O(18)-Tm(1)-O(1)<br>95.2(5)  | O(17)-Tm(1)-O(1)<br>137.8(5) | O(6)-Tm(1)-O(1)<br>130.4(5)  | O(2)-Tm(1)-O(1)<br>69.5(4)   |
| O(5)-Tm(1)-O(1)<br>61.2(4)   | O(3)-Tm(1)-N(4)<br>62.9(5)   | O(18)-Tm(1)-N(4)<br>136.4(5) | O(17)-Tm(1)-N(4)<br>74.0(5)  | O(6)-Tm(1)-N(4)<br>68.5(5)   |
| O(2)-Tm(1)-N(4)<br>88.4(5)   | O(5)-Tm(1)-N(4)<br>115.7(5)  | O(1)-Tm(1)-N(4)<br>128.2(4)  | O(3)-Tm(1)-O(19)<br>137.7(4) | O(18)-Tm(1)-O(19)<br>46.3(3) |
| O(17)-Tm(1)-O(19)<br>74.3(6) | O(6)-Tm(1)-O(19)<br>126.2(4) | O(2)-Tm(1)-O(19)<br>69.4(4)  | O(5)-Tm(1)-O(19)<br>99.7(5)  | O(1)-Tm(1)-O(19)<br>70.5(4)  |

## 2: Magnetic Measurements.

The magnetic susceptibility was measured on polycrystalline samples with the Quantum Design SQUID magnetometer SQUID-VSM in the temperature range 1.8-300 K under an applied field of 1.0 KOe. AC susceptibility measurements were carried out in a zero applied dc field and 1000 Oe dc field for complexes.

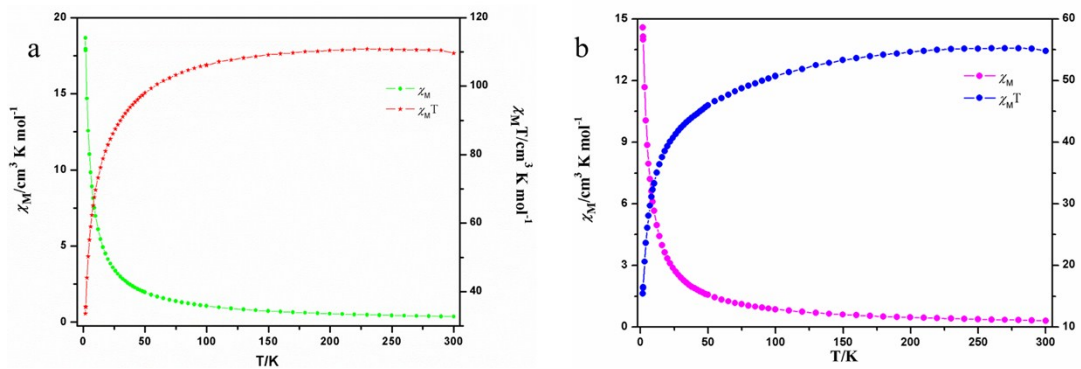

Figure S4. Temperature dependent magnetic susceptibility of complexes (a) {Co<sup>III</sup><sub>4</sub>Ho<sub>8</sub>} (2), (b) {Co<sup>III</sup><sub>4</sub>Tm<sub>8</sub>} (3) (1000 Oe; 2–300 K)

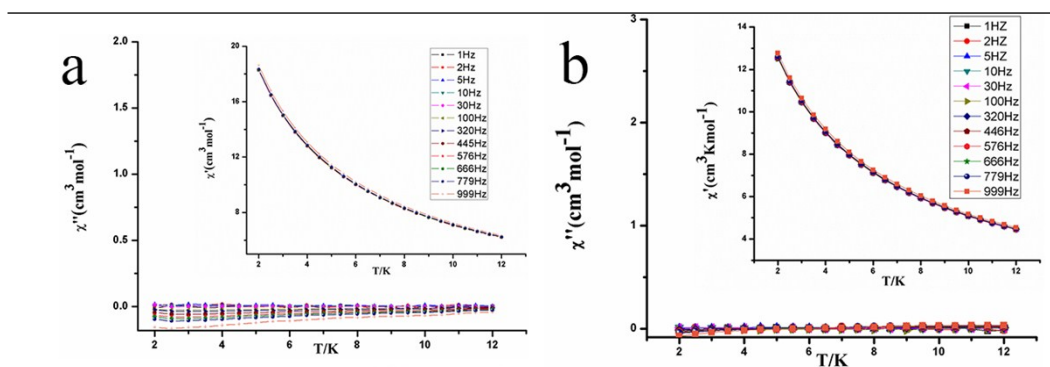

Figure S5. Plots of the out-phase ( $\chi''$ M) and in-phase ( $\chi'$ M) ac magnetic susceptibility vs. T for {Co<sup>III</sup><sub>4</sub>Ho<sub>8</sub>} (2) (a), {Co<sup>III</sup><sub>4</sub>Tm<sub>8</sub>} (3) (b), under zero-applied dc field between 1 and 1000 Hz and between 2.0 and 12 K.

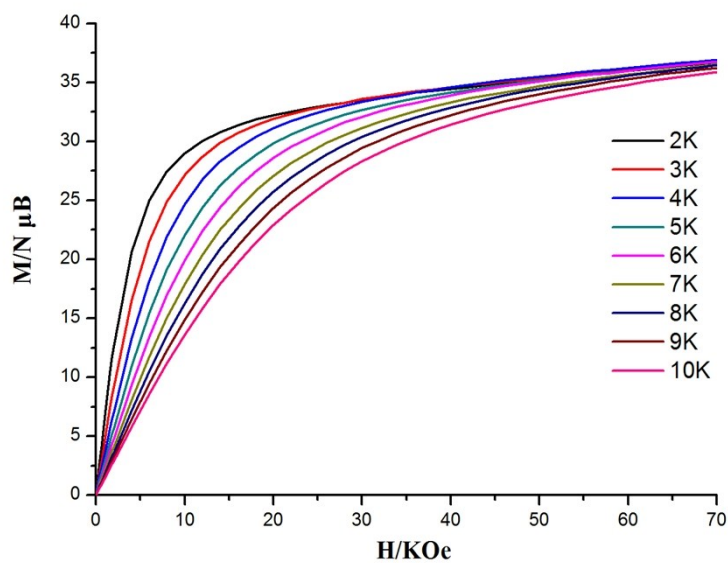

Figure S6. Field dependent magnetization of {Co<sup>III</sup><sub>4</sub>Dy<sub>8</sub>} (1).

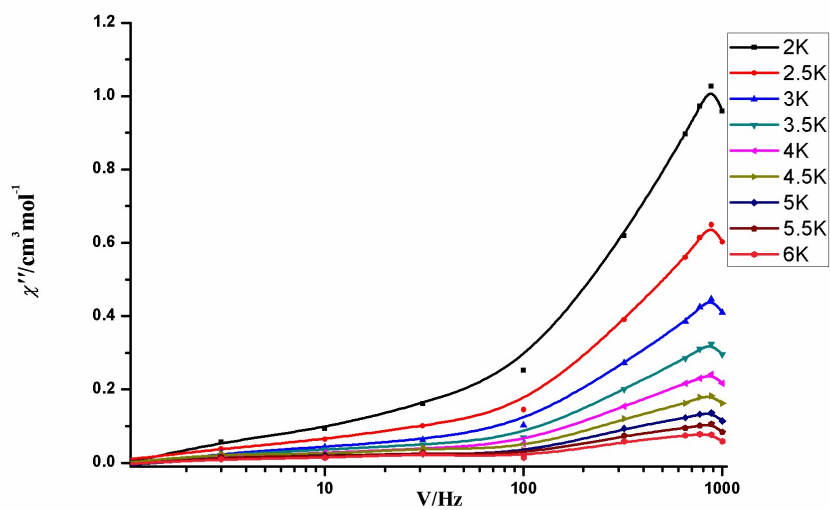

Figure S7.  $\chi''$  vs. frequency for  $\{\text{Co}^{\text{III}}_4\text{Dy}_8\}$  (I) below 6.0 K under zero-dc field.

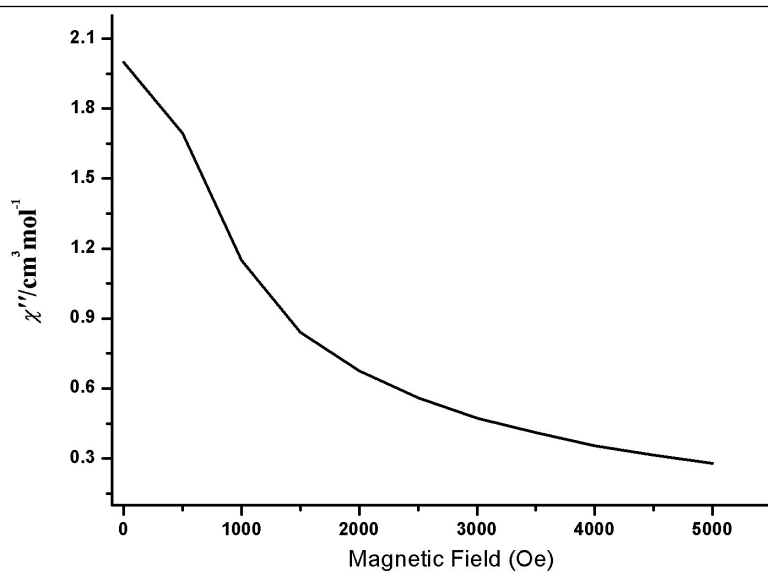

Figure S8. Ac-scanfield data of  $\{\text{Co}^{\text{III}}_4\text{Dy}_8\}$  (I) at 999 Hz and 2.0 K.

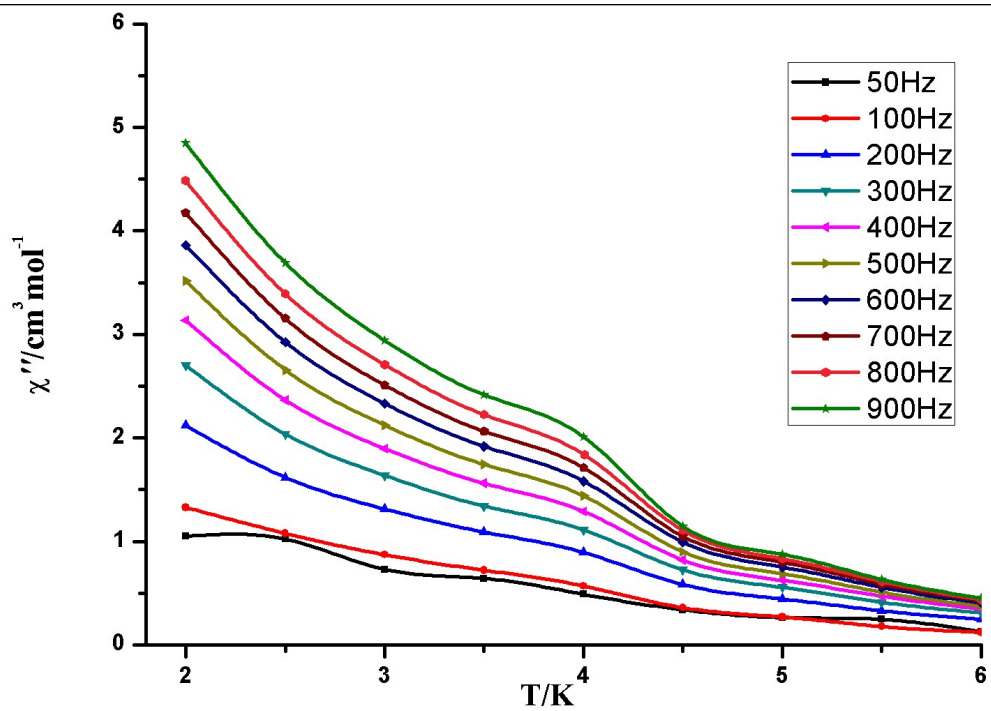

Figure S9. Plots of the out-phase ( $\chi''_M$ ) of  $\{\text{Co}^{\text{III}}_4\text{Dy}_8\}$  (1) between 2 K and 6 K under 1000-dc field.

#### References

- [1] S. Kushner, H. Dalalian, J. L. Sanjurjo, F. L. Bach, S. R. Safir, V. K. Smith, J. H. Williams, *J. Am. Chem. Soc.* **1952**, 3617.
- [2] SAINT v5.0-6.01; Bruker Analytical X-ray Systems Inc.:Madison, WI, **1998**.
- [3] Sheldrick, G. M. SADABS; University of Göttingen: Göttingen, Germany.
- [4] SHELXTL v5.1, Bruker Analytical X-ray Systems Inc.: Madison, WI, **1999**.
